# Supplementary material
Source: PubMed Central journal article supplement (PMC8733904)
Supplement: NIHMS1741141-supplement-Supplementary_Information.pdf [file NIHMS1741141-supplement-Supplementary_Information.pdf]

# Metabolite discovery through global annotation of untargeted metabolomics data

Li Chen<sup>1,2</sup>, Wenyun Lu<sup>2,3</sup>, Lin Wang<sup>2,3</sup>, Xi Xing<sup>2,3</sup>, Ziyang Chen<sup>1,4</sup>, Xin Teng<sup>2</sup>, Xianfeng Zeng<sup>2,3</sup>, Antonio D. Muscarella<sup>2</sup>, Yihui Shen<sup>2</sup>, Alexis Cowan<sup>2,4</sup>, Melanie R. McReynolds<sup>2,3</sup>, Brandon J. Kennedy<sup>5</sup>, Ashley M. Lato<sup>6</sup>, Shawn R. Campagna<sup>6</sup>, Mona Singh<sup>2,7</sup>, Joshua D. Rabinowitz<sup>2,3,4,#</sup>

<sup>1</sup>Shanghai Key Laboratory of Metabolic Remodeling and Health, Institute of Metabolism & Integrative Biology, Fudan University, Shanghai, 200433, China. <sup>2</sup>Lewis-Sigler Institute for Integrative Genomics, Princeton University, Princeton, NJ, 08544, USA. <sup>3</sup>Department of Chemistry, Princeton University, Princeton, NJ, 08544, USA. <sup>4</sup>Department of Molecular Biology, Princeton University, Princeton, NJ, 08544, USA. <sup>5</sup>Lotus Separations, LLC, Department of Chemistry, Princeton University, Princeton, NJ, 08544, USA. <sup>6</sup>Department of Chemistry, The University of Tennessee at Knoxville, Knoxville, TN, 37996, USA. <sup>7</sup>Department of Computer Science, Princeton University, Princeton, NJ, 08544, USA. # Corresponding author, e-mail: [joshr@princeton.edu](mailto:joshr@princeton.edu)

## Supplementary information

### Supplementary Tables:

**Supplementary Table 1.** List of biochemical atom differences

**Supplementary Table 2.** List of abiotic atom differences

**Supplementary Table 3.** Examples of nickel-related peaks

**Supplementary Table 4.** Search results of reported metabolites in compound databases

**Supplementary Table 5.** Memory and run-time used in NetID

### Supplementary Notes:

**Supplementary Note 1.** NetID scoring parameters

**Supplementary Note 2.** Glucosyl-aurine synthesis

**Supplementary Note 3.** NetID user guide

**Supplementary Note 4.** NetID pseudocode

### Supplementary Data (in separate excel files):

**Supplementary Data 1.** NetID annotation for the yeast negative-mode dataset

**Supplementary Data 2.** Atom difference rule table

**Supplementary Data 3.** In-house RT list

**Supplementary Data 4.** HMDB reference compound database

**Supplementary Data 5.** YMDB reference compound database

**Supplementary Data 6.** PubChemLite reference compound database

**Supplementary Data 7.** PubChemLite\_bio reference compound database

**Supplementary Data 8.** MS2 spectra of newly-discovered metabolites

**Supplementary table 1.** List of biochemical atom differences

| Type             | Formula / Atom difference | Mass difference | RDBE <sup>1</sup> difference | Allowed propagation direction <sup>2</sup> |
|------------------|---------------------------|-----------------|------------------------------|--------------------------------------------|
| Deamination      | O1N-1H-1                  | 0.98402         | 0                            | 0                                          |
| Transamination   | N1H3O-1                   | 1.03163         | -1                           | 0                                          |
| Hydrogenation    | H2                        | 2.01565         | -1                           | 0                                          |
| Methylation      | C1H2                      | 14.01565        | 0                            | 0                                          |
| Amination        | N1H1                      | 15.01090        | 0                            | 0                                          |
| Hydroxylation    | O1                        | 15.99491        | 0                            | 0                                          |
| Amination        | N1H3                      | 17.02655        | -1                           | 0                                          |
| Hydration        | H2O1                      | 18.01056        | -1                           | 0                                          |
| Formylation      | C1O1                      | 27.99491        | 1                            | 0                                          |
| Beta oxidation   | C2H4                      | 28.03130        | 0                            | 0                                          |
| Deamination      | C1H2O1                    | 30.01056        | 0                            | 0                                          |
| Thiolation       | S1                        | 31.97207        | 0                            | 0                                          |
| Sulfurization    | H2S1                      | 33.98772        | -1                           | 0                                          |
| Acetylation      | C2H2O1                    | 42.01056        | 1                            | 0                                          |
| Carboxylation    | C1O2                      | 43.98983        | 1                            | 0                                          |
| Isoprenylation   | C5H8                      | 68.06260        | 1                            | 1                                          |
| Sulfurylatoin    | S1O3                      | 79.95681        | 0                            | 0                                          |
| Phosphorylation  | H1P1O3                    | 79.96633        | 0                            | 0                                          |
| Hexose           | C6H10O5                   | 162.05282       | 1                            | 1                                          |
| Uronate          | C6H8O6                    | 176.03209       | 2                            | 1                                          |
| Palmitoylation   | C16H30O1                  | 238.22967       | 1                            | 1                                          |
| Sialic acid      | C11H17N1O8                | 291.09542       | 3                            | 1                                          |
| AMP              | C10H12N5O6P1              | 329.05252       | 7                            | 1                                          |
| CDP              | C9H13N3O10P2              | 385.00762       | 5                            | 1                                          |
| ADP-ribosylation | C15H21N5O13P2             | 541.06111       | 8                            | 1                                          |

1. RDBE stands for ring and double bond equivalence.

2. Allowed propagation direction: "1" means only forward propagation is allowed, i.e. adding the indicated atom differences to the parent formula; "-1" means reverse only, i.e. subtracting the indicated atom differences from the parent formula, and "0" means propagation is allowed for both directions.

**Supplementary table 2.** List of abiotic atom differences

| Type    | Formula / Atom difference | Mass difference | RDBE difference | Allowed propagation direction |
|---------|---------------------------|-----------------|-----------------|-------------------------------|
| Isotope | [10]B-1B1                 | 0.99637         | 0               | -1                            |
| Isotope | [15]N1N-1                 | 0.99703         | 0               | 1                             |
| Isotope | [29]Si-1[30]Si1           | 0.99728         | 0               | 1                             |
| Isotope | [29]Si1Si-1               | 0.99957         | 0               | 1                             |
| Isotope | [53]Cr1Cr-1               | 1.00014         | 0               | 1                             |
| Isotope | [13]C1C-1                 | 1.00335         | 0               | 1                             |
| Isotope | [2]H1H-1                  | 1.00628         | 0               | 1                             |
| Isotope | [34]S1S-1                 | 1.99580         | 0               | 1                             |
| Isotope | [30]Si1Si-1               | 1.99684         | 0               | 1                             |
| Isotope | [37]Cl1Cl-1               | 1.99705         | 0               | 1                             |
| Isotope | [41]K1K-1                 | 1.99812         | 0               | 1                             |
| Isotope | [18]O1O-1                 | 2.00425         | 0               | 1                             |
| Isotope | [44]Ca1Ca-1               | 3.99289         | 0               | 1                             |
| Isotope | [60]Ni1Ni-1               | 1.99544         | 0               | 1                             |
| Isotope | [62]Ni1Ni-1               | 3.99300         | 0               | 1                             |
| Adduct  | H-1Na1                    | 21.98194        | 0               | 1                             |
| Adduct  | Cl1H1                     | 35.97668        | 0               | 1                             |
| Adduct  | H-1K1                     | 37.95588        | 0               | 1                             |
| Adduct  | H-2Ni1                    | 55.91969        | 0               | 1                             |
| Adduct  | Ca1H-2                    | 37.94694        | 0               | 1                             |
| Adduct  | C1H2O2                    | 46.00548        | 0               | 1                             |
| Adduct  | C1H1Na1O2                 | 67.98742        | 0               | 1                             |
| Adduct  | C1H1K1O2                  | 83.96136        | 0               | 1                             |
| Adduct  | C2H4O2                    | 60.02113        | 0               | 1                             |
| Adduct  | C2H3Na1O2                 | 82.00307        | 0               | 1                             |
| Adduct  | C2H3K1O2                  | 97.97701        | 0               | 1                             |
| Adduct  | C2H2Ni1O2                 | 115.94082       | 0               | 1                             |
| Adduct  | C2Ca1H2O2                 | 97.96807        | 0               | 1                             |
| Adduct  | H2O4S1                    | 97.96738        | 0               | 1                             |

| Type     | Formula / Atom difference | Mass difference | RDBE difference | Allowed propagation direction |
|----------|---------------------------|-----------------|-----------------|-------------------------------|
| Adduct   | H1Na1O4S1                 | 119.94932       | 0               | 1                             |
| Adduct   | H1K1O4S1                  | 135.92326       | 0               | 1                             |
| Adduct   | H1N1O3                    | 62.99564        | 0               | 1                             |
| Adduct   | N1Na1O3                   | 84.97759        | 0               | 1                             |
| Adduct   | H2C1O3                    | 62.00039        | 0               | 1                             |
| Adduct   | Na1H1C1O3                 | 83.98234        | 0               | 1                             |
| Adduct   | K1H1C1O3                  | 99.95628        | 0               | 1                             |
| Adduct   | H3O4P1                    | 97.97690        | 0               | 1                             |
| Adduct   | H2Na1O4P1                 | 119.95884       | 0               | 1                             |
| Adduct   | H2K1O4P1                  | 135.93278       | 0               | 1                             |
| Adduct   | Cr1O3                     | 99.92525        | 0               | 1                             |
| Adduct   | H4O4Si1                   | 95.98789        | 0               | 1                             |
| Adduct   | H3N1                      | 17.02655        | 0               | 1                             |
| Adduct   | H-2Na2                    | 43.96389        | 0               | 1                             |
| Adduct   | H-2K2                     | 75.91176        | 0               | 1                             |
| Adduct   | C1H1N1                    | 27.01090        | 0               | 1                             |
| Adduct   | C1H4O1                    | 32.02621        | 0               | 1                             |
| Adduct   | H6O8P2                    | 195.95379       | 0               | 1                             |
| Adduct   | B1H-3                     | 7.98583         | 2               | 1                             |
| Adduct   | B1H-1O1                   | 25.99640        | 1               | 1                             |
| Adduct   | H2O3Si1                   | 77.97732        | 0               | 1                             |
| Adduct   | H1Na1O1                   | 39.99251        | 0               | 1                             |
| Adduct   | H1K1O1                    | 55.96645        | 0               | 1                             |
| Adduct   | C2H3N1                    | 41.02655        | 0               | 1                             |
| Adduct   | C3H8O3Si1                 | 120.02427       | 0               | 1                             |
| Fragment | C1O2                      | 43.98983        | 1               | -1                            |
| Fragment | C1H2O1                    | 30.01056        | 0               | -1                            |
| Fragment | H2O1                      | 18.01056        | -1              | -1                            |
| Fragment | N1H3                      | 17.02655        | -1              | -1                            |
| Radical  | H                         | 1.00783         | -0.5            | -1                            |

**Supplementary table 3.** Examples of nickel related peaks

| peak_id | medMz    | medRt | log10_<br>inten | formula              | $\Delta$ ppm | annotation                                  |
|---------|----------|-------|-----------------|----------------------|--------------|---------------------------------------------|
| 4       | 89.0476  | 13.01 | 8.65            | C3H7N1O2             | 0.92         | C3H7N1O2                                    |
| 1194    | 294.0362 | 13.01 | 5.37            | C8H16N2Ni1O6         | 0.01         | C3H7N1O2 * 2 + C2H2Ni1O2                    |
| 1952    | 296.0316 | 13.01 | 4.98            | [60]Ni1C8H16N2O6     | 0.16         | C3H7N1O2 * 2 + C2H2Ni1O2 + [60]Ni1Ni-1*     |
| 2723    | 234.0149 | 13    | 4.67            | C6H12N2Ni1O4         | 0.74         | C3H7N1O2 * 2 + H-2Ni1                       |
| 2269    | 265.0095 | 13.07 | 4.92            | C7H13N1Ni1O6         | 0.58         | C3H7N1O2 + C2H4O2 + C2H2Ni1O2               |
| 3869    | 267.005  | 13.04 | 4.36            | [60]Ni1C7H13N1O6     | 0.36         | C3H7N1O2 + C2H4O2 + C2H2Ni1O2 + [60]Ni1Ni-1 |
| 855     | 270.0961 | 13.59 | 5.62            | C10H14N4O5           | 1.27         | C10H14N4O5                                  |
| 2005    | 358.0423 | 13.5  | 4.97            | C11H16N4Ni1O6        | 0.14         | C10H14N4O5 + C1H4O1 + H-2Ni1                |
| 2961    | 360.0377 | 13.51 | 4.39            | [60]Ni1C11H16N4O6    | 0.26         | C10H14N4O5 + C1H4O1 + H-2Ni1 + [60]Ni1Ni-1  |
| 125     | 222.0673 | 14.18 | 6.82            | C7H14N2O4S1          | 0.68         | C7H14N2O4S1                                 |
| 2406    | 338.0083 | 14.29 | 4.95            | C9H16N2Ni1O6S1       | -0.08        | C7H14N2O4S1 + C2H2Ni1O2                     |
| 31      | 117.079  | 11.21 | 7.61            | C5H11N1O2            | 0.02         | C5H11N1O2                                   |
| 3450    | 293.041  | 11.24 | 4.54            | C9H17N1Ni1O6         | -0.16        | C5H11N1O2 + C2H4O2 + C2H2Ni1O2              |
| 4664    | 146.069  | 13.39 | 8.28            | C5H10N2O3            | 1.13         | C5H10N2O3                                   |
| 3287    | 262.0098 | 13.4  | 4.53            | C7H12N2Ni1O5         | 0.72         | C5H10N2O3 + C2H2Ni1O2                       |
| 3534    | 322.0311 | 13.37 | 4.38            | C9H16N2Ni1O7         | 0.05         | C5H10N2O3 + C2H2Ni1O2 + C2H4O2              |
| 92      | 612.1521 | 14.19 | 6.98            | C20H32N6O12S2        | -0.19        | C20H32N6O12S2                               |
| 2440    | 668.0718 | 14.2  | 4.87            | C20H30N6Ni1O12S2     | -0.18        | C20H32N6O12S2 + H-2Ni1                      |
| 3528    | 670.0671 | 14.21 | 4.54            | [60]Ni1C20H30N6O12S2 | 0.03         | C20H32N6O12S2 + H-2Ni1 + [60]Ni1Ni-1        |
| 22      | 132.0898 | 16.24 | 7.34            | C5H12N2O2            | 0.77         | C5H12N2O2                                   |
| 4942    | 308.052  | 16.26 | 4.1             | C9H18N2Ni1O6         | -0.48        | C5H12N2O2 + C2H4O2 + C2H2Ni1O2              |

\* “[60]Ni1Ni-1” means adding an isotope <sup>60</sup>Ni and subtracting a regular Ni, representing the atom difference of nickel isotope. This representation aligns atom difference to mass difference.

**Supplementary table 4.** Search results of newly identified metabolites in compound databases

|                                                                                                                              | HMDB    |           | PubChem |                | METLIN  |           | Sci-Finder |                |
|------------------------------------------------------------------------------------------------------------------------------|---------|-----------|---------|----------------|---------|-----------|------------|----------------|
|                                                                                                                              | formula | structure | formula | structure      | formula | structure | formula    | structure      |
| Thiamine + [C <sub>2</sub> H <sub>2</sub> O] (C <sub>14</sub> H <sub>18</sub> N <sub>4</sub> O <sub>2</sub> S)               | X       | X         | √       | X              | X       | X         | √          | √ <sup>2</sup> |
| Thiamine + [C <sub>2</sub> H <sub>4</sub> O] (C <sub>14</sub> H <sub>20</sub> N <sub>4</sub> O <sub>2</sub> S)               | X       | X         | √       | X <sup>1</sup> | X       | X         | √          | X              |
| Thiamine + [C <sub>4</sub> H <sub>6</sub> O <sub>3</sub> ] (C <sub>16</sub> H <sub>22</sub> N <sub>4</sub> O <sub>4</sub> S) | X       | X         | √       | X <sup>1</sup> | X       | X         | √          | X              |
| Thiamine + [C <sub>4</sub> H <sub>8</sub> O] (C <sub>16</sub> H <sub>24</sub> N <sub>4</sub> O <sub>2</sub> S)               | X       | X         | √       | X <sup>1</sup> | X       | X         | √          | X              |
| Glucosyl-aurine (C <sub>8</sub> H <sub>17</sub> NO <sub>8</sub> S)                                                           | X       | X         | √       | √ <sup>2</sup> | X       | X         | √          | √ <sup>2</sup> |

**Note:**

1. Pyrophosphate form of the metabolite exists.
2. Reported only as a synthetic chemical, not a metabolite or biological chemical.

**Supplementary Table 5.** Memory and run-time used in NetID.

|                            | Yeast neg | Yeast pos | Liver neg | Liver pos |
|----------------------------|-----------|-----------|-----------|-----------|
| Total non-background peaks | 5588      | 9833      | 8191      | 12128     |
| Maximum memory used (GB)   | 4.7       | 13.3      | 6.8       | 12.1      |
| Optimization time (min)    | 2.5       | 6.7       | 1.1       | 2.4       |
| Total time (min)           | 24.3      | 101.3     | 31.8      | 94.4      |

**Note:** The maximum memory and run-time reported here is under default parameter setting in NetID.

## Supplementary Note 1 – NetID scoring parameters

### Scoring candidate node annotations

NetID scores every candidate node and edge annotation assigned in the candidate annotation step. The node scoring system aims to assign high scores to annotations that align observed ion peaks with known metabolites based on  $m/z$ , retention time, MS/MS, and/or isotope abundances.

Let the set of candidate annotations for node  $u$  be denoted as  $\{a_1 \dots a_i \dots a_m\}$ . For each node  $u$  and each of its candidate annotation  $a_i$ , let  $S(u, a_i)$  denotes the score of candidate annotation  $a_i$  for node  $u$ . Different scoring components for candidate node annotations are defined as below:

(a)  $S_{m/z}(u, a_i)$  is negative when measured  $m/z$  differs from the calculated  $m/z$  of assigned molecular formula. A larger ppm difference between calculated formula  $m/z$  and measurement  $m/z$  results to lower scores. The default scale factor is -0.5. Let  $a_{i,m/z}$  be the calculated  $m/z$  of annotation  $a_i$ , and  $u_{m/z}$  be the measured  $m/z$  of node  $u$ , then

$$S_{m/z}(u, a_i) = -0.5 \times |u_{m/z} - a_{i,m/z}| / u_{m/z} \times 10^6 \quad (1)$$

(b)  $S_{RT}(u, a_i)$  is positive if the measured RT for the peak corresponding to node  $u$  matches to a known standard. A smaller difference between known and measured RT results in a higher score. Let  $a_{i,RT}$  be the known RT of annotation  $a_i$ , and  $u_{RT}$  be the measured RT of node  $u$ , then

$$S_{RT}(u, a_i) = 1 - |u_{RT} - a_{i,RT}|, \text{ if } |u_{RT} - a_{i,RT}| < 0.5 \text{ min} \\ \text{Otherwise, } S_{RT}(u, a_i) = 0 \quad (2)$$

(c)  $S_{MS2}(u, a_i)$  is positive if the measured MS2 spectrum of node  $u$  matches the database MS2 spectrum of annotation  $a_i$ . A cosine similarity-based scoring function is used to score the MS2 spectra similarity<sup>1,2</sup>. The intensities of the fragment ions in the MS2 spectra are rescaled so that the highest fragment ion is set to 1.

MS2 spectrum is represented as a data table containing  $m/z$  and corresponding relative intensity. Data tables for two spectra (one from experiment and one from database) are merged by  $m/z$ , which yields two equal-length vectors to represent relative intensity for experimental measured MS2 spectrum of  $u$  ( $W_u$ ) and database MS2 spectrum of  $a_i$  ( $W_{a_i}$ ). Cosine similarity (DP) and score for MS2 match ( $S_{MS2}(u, a_i)$ ) are defined as below.

$$DP = \frac{\sum W_u W_{a_i}}{\sqrt{\sum W_u^2 \times \sum W_{a_i}^2}} \quad (3)$$

$$S_{MS2}(u, a_i) = DP, \text{ if } DP > 0.5 \\ \text{Otherwise } S_{MS2}(u, a_i) = 0 \quad (4)$$

(d)  $S_{\text{database}}(u, a_i)$  is positive if the annotated formula  $a_i$  exists in HMDB. We give a positive score to a primary seed node annotation if that annotated formula exists in HMDB.

$$S_{\text{database}}(u, a_i) = 0.5, \text{ if } a_i \text{ in HMDB} \\ \text{Otherwise, } S_{\text{database}}(u, a_i) = 0 \quad (5)$$

(e)  $S_{\text{missing\_isotope}}(u, a_i)$  is negative if an isotopic peak is missing. We penalize a formula annotation if it

passes the intensity threshold (default at  $5 \times 10^4$ ) but does not have isotopic peaks of specified elements. The default isotope being evaluated is  $^{37}\text{Cl}$ . Any other elements, such as  $^{13}\text{C}$  or  $^{18}\text{O}$ , can be included by users.

$$S_{\text{missing\_isotope}}(u, a_i) = -1, \text{ if isotopic peak is missing} \\ \text{Otherwise } S_{\text{missing\_isotope}}(u, a_i) = 0 \quad (6)$$

(f)  $S_{\text{rule}}(u, a_i)$  is negative if annotation  $a_i$  violates basic chemical rules. We strongly penalize formulae that violate basic chemical rules, including a negative RDBE (ring and double bond equivalents), and unlikely element ratios in metabolites ( $\text{O/P} < 3$ ,  $\text{O/Si} < 2$ ).

$$S_{\text{rule}}(u, a_i) = -10, \text{ if chemical rules are violated} \\ \text{Otherwise, } S_{\text{rule}}(u, a_i) = 0 \quad (7)$$

(g)  $S_{\text{derivative}}(u, a_i)$  is a non-negative score that reflects annotation  $a_i$  for node  $u$  gains confidence that derived from its parent node  $p$  with candidate annotation  $h$ . This is particularly helpful in annotating abiotic peaks. For example, annotation of glutamate sodium adduct will be given a positive  $S_{\text{derivative}}$  when its parent node is annotated as glutamate with high score  $S_{\text{parent}}(p, h)$ .  $S_{\text{parent}}(p, h)$  is calculated by summing up scores in (a)-(f).

$$S_{\text{derivative}}(u, a_i) = S_{\text{parent}}(p, h) - 0.5, \text{ if } S_{\text{parent}}(p, h) > 0.5 \\ \text{Otherwise, } S_{\text{derivative}}(u, a_i) = 0 \quad (8)$$

$$S_{\text{parent}}(p, h) = S_{\text{m/z}}(p, h) + S_{\text{RT}}(p, h) + S_{\text{MS2}}(p, h) + \\ S_{\text{database}}(p, h) + S_{\text{missing\_isotope}}(p, h) + S_{\text{rule}}(p, h) \quad (9)$$

A final score  $S(u, a_i)$  for each candidate annotation  $a_i$  of node  $u$  is calculated by summing scores in (a)-(g).

$$S(u, a_i) = S_{\text{m/z}}(u, a_i) + S_{\text{RT}}(u, a_i) + S_{\text{MS2}}(u, a_i) + S_{\text{database}}(u, a_i) + \\ S_{\text{missing\_isotope}}(u, a_i) + S_{\text{rule}}(u, a_i) + S_{\text{derivative}}(u, a_i) \quad (10)$$

Note that for each node  $u$ , no annotation is always a candidate option. The node score for this null annotation is 0 at default. It can also be set to a positive value to decrease false positive annotations or a negative value to promote increased annotation completeness (at the expense of more false positives).

### Scoring candidate edge annotations

The edge scoring system aims to assign high scores to edge annotations that correctly capture biochemical connections between metabolites (based on MS2 spectra similarity) and abiotic connections between metabolites and their mass spectrometry phenomena derivatives, such as isotopes and adducts. Biochemical, isotope, and adduct edge annotations are the most common types. Other less common abiotic connection types are described in a subsequent section.

Suppose we consider two nodes  $u$  and  $v$  that are connected by an edge  $(u, v)$ . For each pair of nodes  $u$  and  $v$  such that there is an edge  $(u, v)$ , let the set of candidate formula for node  $u$  and  $v$  be denoted as  $\{a_1 \dots a_i \dots a_m\}$  and  $\{b_1 \dots b_j \dots b_n\}$ , respectively, and let the set of candidate atom differences for edge  $(u, v)$  be  $\{D_1 \dots D_k \dots D_l\}$ . Let  $S(u, v, a_i, b_j, D_k)$  be the score of choosing candidate formula  $a_i$  for node  $u$ , candidate formula  $b_j$  for node  $v$  and candidate atom difference  $D_k$  for edge  $(u, v)$ . Note that  $S(u, v, a_i, b_j, D_k)$  is set to be 0 if atom difference  $D_k$  does not represent the formula difference of  $a_i$  and



$b_j$ .

$$S(u, v, a_i, b_j, D_k) = 0, \text{ if } |a_i - b_j| \neq D_k \quad (11)$$

Different scoring components for candidate edge annotations are defined as below:

(h) When node  $u$  and  $v$  have experimental measured MS2 spectra,  $S_{\text{MS2\_similarity}}(u, v, a_i, b_j, D_k)$  is defined for a biochemical edge, and is a positive score if two connected nodes  $u$  and  $v$  have MS2 similarity.  $S_{\text{MS2\_similarity}}$  is determined using the cosine similarity of the MS2 spectra (DP), as described in previous section, and the neutral ion loss similarity (DP\_R) in the MS2 spectra<sup>1</sup>. In calculating DP\_R, data tables for two spectra (one from node  $u$  and one from node  $v$ ) are merged by [precursor  $m/z$  – fragment  $m/z$ ]. Two equal-length vectors representing the relative intensity of measured MS2 spectrum of  $u$  and  $v$  are denoted as  $R_u$  and  $R_v$  respectively.  $S_{\text{MS2\_similarity}}$  is set at 0 for abiotic edges.

$$\text{DP} = \frac{\sum W_u W_v}{\sqrt{\sum W_u^2 \times \sum W_v^2}} \quad (12)$$

$$\text{DP\_R} = \frac{\sum R_u R_v}{\sqrt{\sum R_u^2 \times \sum R_v^2}} \quad (13)$$

$$S_{\text{MS2\_similarity}}(u, v, a_i, b_j, D_k) = \max(\text{DP}, \text{DP\_R}), \text{ if } \max(\text{DP}, \text{DP\_R}) > 0.3$$

$$\text{Otherwise, } S_{\text{MS2\_similarity}}(u, v, a_i, b_j, D_k) = 0 \quad (14)$$

(i)  $S_{\text{co\_elution}}(u, v, a_i, b_j, D_k)$  is defined for an abiotic edge, and is a negative score if the RT of two connected nodes differ more than a threshold (0.05 min), given the formula difference of  $a_i$  and  $b_j$  matches the atom difference defined by  $D_k$ .  $S_{\text{co\_elution}}$  is set at 0 for biochemical edges.

$$S_{\text{co\_elution}}(u, v, a_i, b_j, D_k) = -5 \times |u_{\text{RT}} - v_{\text{RT}}|, \text{ if } |u_{\text{RT}} - v_{\text{RT}}| \geq 0.05 \text{ min}$$

$$\text{Otherwise, } S_{\text{co\_elution}}(u, v, a_i, b_j, D_k) = 0 \quad (15)$$

(j)  $S_{\text{type}}(u, v, a_i, b_j, D_k)$  is defined for all edges, given the formula difference of  $a_i$  and  $b_j$  matches the atom difference defined by  $D_k$ , and is a non-negative score depending on the connection type of edge, which is defined by  $D_k$ , including biotransformation, adduct, isotope and fragment (Supplementary Table 1, 2). The magnitude of scores reflects the empirical confidence in the annotation type when certain atom differences occur, and can be adjusted based on user preferences.

$$S_{\text{type}}(u, v, a_i, b_j, D_k) = 0, \text{ if } D_k \in \text{biotransformation}$$

$$S_{\text{type}}(u, v, a_i, b_j, D_k) = 0.5, \text{ if } D_k \in \text{adduct}$$

$$S_{\text{type}}(u, v, a_i, b_j, D_k) = 2, \text{ if } D_k \in \text{isotope}$$

$$S_{\text{type}}(u, v, a_i, b_j, D_k) = 0.3, \text{ if } D_k \in \text{common neutral loss} \quad (16)$$

(k) For each  $D_k \in \text{isotope}$ ,  $S_{\text{isotope\_intensity}}(u, v, a_i, b_j, D_k)$  is defined for isotope edge  $(u, v)$  where  $b_j$  is the isotopic derivative of  $a_i$  with atom difference of  $D_k$ , and is a negative score if the measured isotope peaks deviate from expected natural abundance. The score for an isotope edge depends on how likely the ratio of measured and expected isotopic intensity ( $\text{Ratio}_{\text{isotope}}$ ) is observed in an empirical normal distribution  $N(1, \sigma_{\text{isotope}}^2)$ . Isotopes of all elements included in the atom difference table are evaluated.

$$\text{Ratio}_{\text{isotope}} = \frac{v_{\text{intensity}} / u_{\text{intensity}}}{\text{Expected isotopic intensity ratio } (a_i, b_j, D_k)} \quad (17)$$

$$S_{\text{isotope\_intensity}}(u, v, a_i, b_j, D_k) = \log_{10} \left[ \frac{\text{normPDF}(\text{Ratio}_{\text{isotope}}, 1, \sigma_{\text{isotope}}^2)}{\text{normPDF}(1, 1, \sigma_{\text{isotope}}^2)} \right] \quad (18)$$

$\text{normPDF}(x, \mu, \sigma_{\text{isotope}}^2)$  is defined as the normal probability density function with mean  $\mu$  and variance  $\sigma_{\text{isotope}}^2$  evaluated at the values in  $x$ .  $\sigma_{\text{isotope}}$  is empirically defined as below, so that when measured isotope intensity is close to detection limit, a larger  $\sigma_{\text{isotope}}$  (a widened distribution, which is more tolerant to discrepancy) will be used.

$$\sigma_{\text{isotope}} = 0.2 + 10^{3 - \log_{10}(v_{\text{intensity}})} \quad (19)$$

A final edge annotation score  $S(u, v, a_i, b_j, D_k)$  for choosing candidate formula  $a_i$  for node  $u$ , candidate formula  $b_j$  for node  $v$  and candidate atom difference  $D_k$  for edge  $(u, v)$  is calculated by summing scores in (h)-(n).

$$S(u, v, a_i, b_j, D_k) = S_{\text{MS2\_similarity}}(u, v, a_i, b_j, D_k) + S_{\text{co\_elution}}(u, v, a_i, b_j, D_k) + S_{\text{type}}(u, v, a_i, b_j, D_k) + S_{\text{isotope\_intensity}}(u, v, a_i, b_j, D_k) \quad (20)$$

### Less common edge annotations

LC-MS metabolomics may include additional abiotic relationships. In orbitrap data, these include oligomers, multi-charge species, heterodimers, in-source fragments of known or unknown metabolites<sup>3</sup>, and ringing artifact peaks surrounding high intensity ions<sup>4,5</sup>. These relationships were included in NetID as additional edge types, which are evaluated for all  $m/z$  pairs within a predefined RT range (0.2 min). Associated scores are provided at the end of the section.

(l) Oligomer and multi-charge species. An oligomer/multi-charge edge is assigned between two nodes  $u$  and  $v$ , if their  $m/z$  satisfy

$$|v_{m/z} - n \times u_{m/z}| < u_{m/z} \times 10 \text{ ppm}, n \in \{\text{positive integers}\} \quad (21)$$

(m) Heterodimer. Heterodimer peak (node  $v$ ) may be observed when one abundant metabolite (node  $u$ ) forms ion cluster with other ion species (node  $t$ ). We examine nodes that have intensity above  $10^5$ , and assign a heterodimer edge between two nodes  $u$  and  $v$  if their  $m/z$  difference satisfy

$$|(v_{m/z} - u_{m/z}) - t_{m/z}| < u_{m/z} \times 10 \text{ ppm} \quad (22)$$

(n) In-source fragments. Such peaks may be observed when one abundant metabolite breaks up into fragments during the ionization process.

Database MS2 of known metabolites can be used to identify known ion fragment peaks<sup>3</sup>. If candidate annotation  $b_j$  of node  $v$  is annotated with a HMDB ID associated with database MS2 spectrum, and  $m/z$

of node  $u$  matches to a fragment  $m/z$  in  $b_j$ 's MS2 spectrum, then a database fragment edge will connect such two nodes. That is,

$$u_{m/z} \in \text{Database MS2 spectrum of candidate annotation } b_j \text{ of node } v \quad (23)$$

Measured MS2 spectra can also be used to identify fragment peaks (including covering unknowns not present in MS2 database). If node  $v$  is associated with a measured MS2 spectrum, and  $m/z$  of another node  $u$  matches to a fragment  $m/z$  in the MS2 spectra, then an experiment fragment edge will connect such two nodes. That is,

$$u_{m/z} \in \text{Measured MS2 spectrum of node } v \quad (24)$$

(o) Ringing artifacts. Ringing peaks are artifact peaks (node  $v$ ) often observed on both sides of the  $m/z$  of an intense ion peak (node  $u$ ) in Fourier-transformed MS instrument including orbitrap. We examine nodes that have intensity above  $10^6$ , and assign a ringing artifact edge between two nodes if two nodes satisfy

$$\begin{aligned} 50 \text{ ppm} < |v_{m/z} - u_{m/z}| / u_{m/z} < 1000 \text{ ppm} \\ u_{\text{intensity}} / v_{\text{intensity}} > 50 \end{aligned} \quad (25)$$

Scoring of these additional abiotic edges follow the same rules described in the "Scoring edge annotations" section with additional  $S_{\text{type}}$  defined as below.

$$\begin{aligned} S_{\text{type}}(u, v, a_i, b_j, D_k) &= 0.5, \text{ if } D_k \in \text{oligomer or multi-charge} \\ S_{\text{type}}(u, v, a_i, b_j, D_k) &= 0, \text{ if } D_k \in \text{heterodimer} \\ S_{\text{type}}(u, v, a_i, b_j, D_k) &= 0.3, \text{ if } D_k \in \text{database MS2 fragment} \\ S_{\text{type}}(u, v, a_i, b_j, D_k) &= 1, \text{ if } D_k \in \text{measured MS2 fragment} \\ S_{\text{type}}(u, v, a_i, b_j, D_k) &= 2, \text{ if } D_k \in \text{ringing artifacts} \end{aligned} \quad (26)$$

A final edge annotation score  $S(u, v, a_i, b_j, D_k)$  for choosing candidate formula  $a_i$  for node  $u$ , candidate formula  $b_j$  for node  $v$  and candidate atom difference  $D_k$  for edge  $(u, v)$  is calculated by summing scores in (h)-(o).

$$\begin{aligned} S(u, v, a_i, b_j, D_k) &= S_{\text{MS2\_similarity}}(u, v, a_i, b_j, D_k) + S_{\text{co\_elution}}(u, v, a_i, b_j, D_k) + \\ &S_{\text{type}}(u, v, a_i, b_j, D_k) + S_{\text{isotope\_intensity}}(u, v, a_i, b_j, D_k) \end{aligned} \quad (27)$$

### Parameters to edit in different usage situations

Currently the algorithm is developed using Thermo Orbitrap instruments results. We anticipate the algorithm will work for other high mass accuracy data, such as TOF data. Due to the difference in mass resolving power and mass accuracy between TOF and orbitrap, in applying NetID to TOF data, it would be important to check parameters related to mass accuracy, e.g. the  $m/z$  tolerance for seed matching and candidate node annotations, and the score evaluating  $m/z$  accuracy for candidate node annotations. Other data acquisition differences may also impact the optimal parameter settings in NetID. For example, if sample type (e.g. yeast vs mouse) is different, users may check on choice of reference library and if ionization settings (e.g. high vs low in-source CID) is different, users may check on the scoring parameters related to forming clustered ion species such as oligomers or heterodimers. The overall logics is to assign high scores to those candidate annotations that effectively align the experimentally observed ion peaks with prior metabolomics knowledge, so the network optimization will lead to an optimal annotation.

## Supplementary Note 2 – Glucosyl-aurine synthesis

Glucosyl-aurine synthesis was carried out following previous literature reports with slight modifications<sup>6</sup>. In brief, dry methanol was obtained by distillation of HPLC-grade methanol (Fisher; HPLC grade 0.2 micron filtered) over CaH<sub>2</sub> (Acros Organics; ca. 93% extra pure, 0-2 mm grain size). A flame-dried round-bottom flask equipped with a reflux condenser and stir bar was charged with 2.0 g taurine (Alfa Aesar; 99%), 3.1 g D-glucose (Acros Organics; ACS reagent), and 80 mL of dry methanol. This mixture was sonicated under an inert atmosphere for 30 min before being returned to the manifold for the reaction. To the fine-suspension of taurine and glucose in dry methanol at room temperature, 4.0 mL 5.4 M sodium methoxide in methanol (Acros Organics) was added via glass syringe. At this point, the suspension began to dissolve and after 30 minutes, gave a clear and colorless solution. The solution was stirred vigorously under an inert atmosphere for 72 hours, which resulted in a faint peach-colored solution. This solution was chilled to 0 °C, and ~200 mL of absolute ethanol (200 proof) was added and precipitation was allowed to occur at this temperature for 30 minutes. Solvent was then removed by filtration over a glass filter (medium porosity), and washed with ~100 mL of absolute ethanol, affording a fine pale-yellow powder (2.4 g; crude material).

NMR was carried out to validate the structure of synthesized N-glucosyl-aurine. Selective TOCSY experiments using DIPSI2 spin-lock and with added chemical shift filter<sup>7</sup> were run on a Bruker Avance III HD NMR spectrometer equipped with a custom-made QCI-F cryoprobe (Bruker, Billerica, MA) at 800 MHz and at 295 K controlled temperature. The sample was dissolved in DMSO-d<sub>6</sub>. The spectra shown on the plots are results of 200 ms SL mixing, 8 scans each. Data processing (MNova v.14, Mestrelab Research S.L., Santiago de Compostela, Spain) included zero filling, 1 Hz Gaussian apodization, phase- and baseline correction. NMR analysis suggests that the final crude material contains 5.2% N-glucosyl-aurine mixed with unreacted substrates (Extended Data Fig. 8).

### Supplementary references:

1. Shen, X. *et al.* Metabolic reaction network-based recursive metabolite annotation for untargeted metabolomics. *Nature Communications* **10**, 1516 (2019).
2. Stein, S. E. & Scott, D. R. Optimization and testing of mass spectral library search algorithms for compound identification. *J Am Soc Mass Spectrom* **5**, 859–866 (1994).
3. Xue, J. *et al.* Enhanced in-Source Fragmentation Annotation Enables Novel Data Independent Acquisition and Autonomous METLIN Molecular Identification. *Anal. Chem.* **92**, 6051–6059 (2020).

4. Wang, L. *et al.* Peak Annotation and Verification Engine for Untargeted LC–MS Metabolomics. *Anal. Chem.* **91**, 1838–1846 (2019).
5. Mitchell, J. M. *et al.* New methods to identify high peak density artifacts in Fourier transform mass spectra and to mitigate their effects on high-throughput metabolomic data analysis. *Metabolomics* **14**, 125 (2018).
6. Cho, H. J., You, J. S., Chang, K. J., Kim, K. S. & Kim, S. H. Anti-adipogenic Effect of Taurine-Carbohydrate Derivatives. *Bulletin of the Korean Chemical Society* **35**, 1863–1866 (2014).
7. Robinson, P. T., Pham, T. N. & Uhrin, D. In phase selective excitation of overlapping multiplets by gradient-enhanced chemical shift selective filters. *Journal of Magnetic Resonance* **170**, 97–103 (2004).

# Supplementary Note 3 - NetID User Guide

*Li Chen, Ziyang Chen*

**8 August 2021**

Liquid chromatography-high resolution mass spectrometry (LC-MS)-based metabolomics aims to identify and quantitate all metabolites, but most LC-MS peaks remain unidentified. Here, we present a global network optimization approach, NetID, to annotate untargeted LC-MS metabolomics data. The approach aims to generate, for all experimentally observed ion peaks, annotations that match the measured masses, retention times, and (when available) MS/MS fragmentation patterns. Peaks are connected based on mass differences reflecting adducting, fragmentation, isotopes, or feasible biochemical transformations. Global optimization generates a single network linking most observed ion peaks, enhances peak assignment accuracy, and produces chemically-informative peak-peak relationships, including for peaks lacking MS/MS spectra. Applying this approach to yeast and mouse data, we identified five previously unrecognized metabolites (thiamine derivatives and N-glucosyl-aurine). Isotope tracer studies indicate active flux through these metabolites. Thus, NetID applies existing metabolomic knowledge and global optimization to substantially improve annotation coverage and accuracy in untargeted metabolomics datasets, facilitating metabolite discovery.

NetID requires (1) a peak table (in .csv format) containing m/z, RT and intensity from high-resolution mass spectrometry data; (2) a reference compound database, for which we provide HMDB, YMDB, a lite version of PubChem (PubChemLite.0.2.0) and a subset of 47,101 biopathway related entries (PubChemLite\_Bio) that the user may choose; and. (3) a transformation table (in .csv format), for which we assembled a list of 25 biochemical atom differences and 59 abiotic atom differences. NetID optionally use (4) a list of excel files containing MS2 fragmentation information (m/z and intensity) for peaks in the above peak table and (5) a list of known metabolites' retention time, for which we provide our in-house retention time list for demonstration. Users can customize the compound database, the transformation table and the retention time list following the user guide. Currently the algorithm is developed using Thermo Orbitrap instruments results. We anticipate the algorithm will work for other high mass accuracy data, such as TOF data, but parameters may need to be optimized for the best performance.

Citation: <https://www.biorxiv.org/content/10.1101/2021.01.06.425569>

Git-hub: <https://github.com/LiChenPU/NetID>

## 1 Environment Setup

---

This section provides step-by-step instructions to set up the environment to run NetID algorithm in a local computer. A Windows system is recommended. Typical install time on a "normal" desktop computer is within a few hours.

### 1.1 Software installation

- Install R, Rstudio, Rtools40, ILOG CPLEX Optimization Studio (CPLEX) and Git, preferably at default location.

## Supplementary Note 3 - NetID User Guide

**R**(version 4.0, 4.1 tested): <https://www.r-project.org/>  
**RStudio**: <https://rstudio.com/products/rstudio/download>  
**Rtools40**: <https://cran.r-project.org/bin/windows/Rtools/ow>  
**CPLEX**(version 12.8,12.10,20.10 tested): <https://www.ibm.com/academic/technology/data-science>  
**Git**: <https://git-scm.com/downloads>

## 1.2 Code download

### 1.2.1 Via Git (recommended)

1. Install **git** via <https://support.rstudio.com/hc/en-us/articles/200532077?version=1.3.1093&mode=desktop>
2. In Rstudio, go to **File** → **New project** → **Version control** → **Git**, enter <https://github.com/LiChenPU/NetID.git> for URL, select a subdirectory, and create project.
3. You should be able to see all files in place under your selected subdirectory. Use pull option to check for latest updates.

### 1.2.2 Via Github

1. Go to website <https://github.com/LiChenPU/NetID>, hit the green **code** button, select download zip, and unzip files.

## 1.3 Package dependency installation

### 1.3.1 Install common packages

1. Open the R script `NetID_packages.R` in `get started` folder.
2. Run all lines.
3. Run all lines again. If you see “No new packages added...”, then it means all packages are successfully installed.

### 1.3.2 Install cplexAPI

The package, **cplexAPI**, connecting R to CPLEX, requires additional installation steps.

1. Go to website: <https://cran.r-project.org/web/packages/cplexAPI/index.html>, look for **Package source**, and download `cplexAPI_1.4.0.tar.gz`. In the same page, look for **Materials**, a package installation guide can be found in the link **INSTALL**.
2. Unzip the folder `cplexAPI` to the **desktop**, open subfolder `src`, follow the installation guide to modify the file `Makevars.win`.

**Note:** Replace `\` in the `Makevars.win` file into `/` in order for R to recognize the path.

- For example, the `-I"${CPLEX_STUDIO_DIR}\cplex\include"` needs to be replaced with the path CPLEX\_studio is installed, such as:  
`-I"C:/Program Files/IBM/ILOG/CPLEX_Studio1210/cplex/include"`
- The `-L"${CPLEX_STUDIO_LIB}"` needs to be replaced with the path CPLEX\_studio is installed, such as:  
`-L"C:/Program Files/IBM/ILOG/CPLEX_Studio1210/cplex/bin/x64_win64"`

## Supplementary Note 3 - NetID User Guide

- The last part “-lcplexXXX” needs to be replaced with specific version code. For example, use “-lcplex12100” for CPLEX\_Studio1210, and “-lcplex2010” for CPLEX\_Studio201
3. build package,
    - In command line, change `${Username}` to the actual user name and run line below, `R CMD build --no-build-vignettes --no-manual --md5 "C:\Users\${Username}\Desktop\cplexAPI"`
    - Alternatively, you can run the lines below in Rstudio:  
`setwd('C:/Users/${Username}/Desktop/cplexAPI') devtools::build(vignettes = FALSE)`

a new package `cplexAPI_1.4.0.tar.gz` will be built under the default path (for example, `C:\Users\${Username}`)

**Note:** You need to add R and Rtools40 to Environmental Variables PATH, with instruction provided at the end.
  4. In command line, run line below to install package.  
`R CMD INSTALL --build --no-multiarch .\cplexAPI_1.4.0.tar.gz`  
If you see `DONE (cplexAPI)`, then the package installation is successful.  
**Note:** if error occurs relating to `__declspec(dllimport deprecated)`, you need to go to `C:\Program Files\IBM\ILOG\CPLEX_Studio1210\cplex\include\ilcplex` (or your own installation folder), open the file `cpconst.h`, go to the line indicated in the error message or search for `__declspec(dllimport deprecated)`, add `_` in between, make it to `__declspec(dllimport_deprecated)`. Save file and repeat *step 4*.
  5. To test if `cplexAPI` is installed properly and to take a short venture using CPLEX in R, refer to **Package `cplexAPI` – Quick Start** in <https://cran.r-project.org/web/packages/cplexAPI/index.html>.

## 2 Using NetID

---

This section will use yeast negative-mode dataset and mouse liver negative-mode dataset as examples to walk through the NetID workflow.

**Note 1:** If other EI-MAVEN version was used, check the “raw\_data.csv” for the column number where the first sample is located, and specify that in the `NetID_run_script.R` file. For example, In EI-MAVEN (version 7.0), `first_sample_col_num` is set at 15 as default. If EI-MAVEN (version 12.0) is used, `first_sample_col_num` should be set at 16.

**Note 2:** for more advanced uses, scoring and other parameters can be edited in `NetID_function.R` and `NetID_run_script.R`. Read the manuscript method section for detailed explanation on parameters.\*

### 2.1 Yeast negative-mode dataset

In the `Sc_neg` folder, file `raw_data.csv` is the output from **Elmaven** recording MS information, and is the input file for **NetID**. MS2 is not collected for this dataset.

#### 2.1.1 Running the code

1. Open code folder → `NetID_run_script.R`



## Supplementary Note 3 - NetID User Guide

2. In the `# Setting path ####` section, set `work_dir` as `"../Sc_neg/"`.

```
# Setting path ####
{
  setwd(dirname(rstudioapi::getSourceEditorContext()$path))
  source("NetID_function.R")

  work_dir = "../Sc_neg/"
  setwd(work_dir)
  printtime = Sys.time()
}
```

3. In the `# Read data and files ####` section, set `filename` as `"raw_data.csv"`, set `MS2_folder` as `"`.  
set `ion_mode` as `-1` if negative ionization data is loaded, and `1` if positive ionization data loaded.

```
# Read data and files ####
{
  Mset = list()
  # Read in files
  Mset = read_files(filename = "raw_data.csv",
                    LC_method = "Hilic_25min_QE",
                    ion_mode = -1 # 1 for pos mode and -1 for neg mode
                    )
  Mset = read_MS2data(Mset,
                     MS2_folder = "") # MS2
}
```

4. Keep all other parameters as default, and run all lines.

### 2.1.2 Expected outputs

1. In the console, error message should not occur. If optimization step is successful, you will see messages in the following format.

```
"Optimization ended successfull - integer optimal, tolerance - OBJ_value = 2963.71
(bestobjective - bestinteger) / (1e-10 + |bestinteger|) = 0.000048268"
95.74 sec elapsed
```

2. Three files will be generated in the `Sc_neg` folder. Expected run time on a "normal" desktop computer should be within an hour.
  - `NetID_output.csv` contains the annotation information for each peak.
  - `NetID_output.RData` contains node, edge and network information. The file will be used for network visualization in Shiny R app.
  - `.RData` records the environmental information after running codes. The file is mainly used for development and debugging.

## 2.2 Your own dataset

### 2.2.1 MS1 dataset preparation

1. File conversion. Use software **ProteoWizard40** (version 3.0.11392) to convert LC-MS raw data files (.raw) into mzXML format. A command line script specifies the conversion parameter. Assuming the raw data are in D:/MS data/test. Type in the scripts below.

```
D:
cd D:/MS data/test
"C:/Program Files/ProteoWizard/ProteoWizard 3.0.11392/msconvert.exe"
*.raw --filter "peakPicking true 1-" --simAsSpectra --srmAsSpectra --mzXML
```

If **ProteoWizard** is installed in location other than C:/Program Files/ProteoWizard/ProteoWizard 3.0.11392/msconvert.exe, specify your path to where you can find the msconvert.exe file. Expected outputs will be .mzXML files from .raw data.

2. **EI-MAVEN (version 7.0)** is used to generate a peak table containing m/z, retention time, intensity for peaks. Detailed guides for peak picking can be found in <https://elucidatainc.github.io/EIMaven/faq/>. After peak picking and a peak table tab has shown up, click export to CSV. Choose export all groups. In the pop-up saved window, choose format Groups Summary Matrix Format Comma Delimited. Save to the desired path.
3. Under the NetID folder, create a new folder NetID\_test, copy the csv file from step 2 into the folder, and change the filename into raw\_data.csv.

### 2.2.2 MS2 dataset preparation

**NetID** currently utilizes targeted MS2 data for better MS2 quality, and will incorporate data-dependent MS2 data in the future.

1. Prepare MS2 inclusion list  
For targeted MS2 analysis, from the peak list generated in step 1, select the peaks (m/z, RT) that you want to perform MS2, and arrange them into multiple csv files that will serve as the inclusion lists to set up the PRM method on **Thermo QExactive** instrument. Instruction can be found in [https://proteomicsresource.washington.edu/docs/protocols05/PRM\\_QExactive.pdf](https://proteomicsresource.washington.edu/docs/protocols05/PRM_QExactive.pdf).  
*Note:* Arrange the parent ions so as to avoid to perform many PRMs at same time. An example is shown below with the start and End time set as RT-1.5 and RT+1.5 (min) to have good chromatogram coverage.

```
library(readr)
read_csv("example.csv")
##
## -- Column specification -----
## cols(
##   Mass = col_double(),
##   Formula = col_logical(),
##   Formula_type = col_logical(),
##   Species = col_logical(),
##   CS = col_logical(),
##   Polarity = col_character(),
##   Start = col_double(),
##   End = col_double(),
##   CE = col_double(),
```

## Supplementary Note 3 - NetID User Guide

```
## CE_type = col_character(),
## MSXID = col_logical(),
## Comment = col_character()
## )
## # A tibble: 16 x 12
##   Mass Formula Formula_type Species CS Polarity Start End CE CE_type
##   <dbl> <lgl> <lgl> <lgl> <lgl> <chr> <dbl> <dbl> <dbl> <chr>
## 1 499. NA NA NA NA Negative 0.456 3.46 30 NCE
## 2 722. NA NA NA NA Negative 0.733 3.73 30 NCE
## 3 403. NA NA NA NA Negative 1.06 4.06 30 NCE
## 4 211. NA NA NA NA Negative 1.20 4.20 30 NCE
## 5 328. NA NA NA NA Negative 1.40 4.40 30 NCE
## 6 149. NA NA NA NA Negative 1.59 4.59 30 NCE
## 7 151. NA NA NA NA Negative 2.69 5.69 30 NCE
## 8 335. NA NA NA NA Negative 2.70 5.70 30 NCE
## 9 143. NA NA NA NA Negative 4.07 7.07 30 NCE
## 10 89.0 NA NA NA NA Negative 5.67 8.67 30 NCE
## 11 283. NA NA NA NA Negative 6.92 9.92 30 NCE
## 12 202. NA NA NA NA Negative 8.79 11.8 30 NCE
## 13 160. NA NA NA NA Negative 10.3 13.3 30 NCE
## 14 216. NA NA NA NA Negative 11.4 14.4 30 NCE
## 15 125. NA NA NA NA Negative 12.0 15.0 30 NCE
## 16 230. NA NA NA NA Negative 12.9 15.9 30 NCE
## # ... with 2 more variables: MSXID <lgl>, Comment <chr>
```

### 2. Instrument setup

Set up the **QExactive** instrument so that it contains both “Full MS” and “PRM” scan events. For PRM setup, use the above file as inclusion list to perform targeted MS2 analysis. We typically use the following setting for MS2 analysis: resolution 17500, AGC target 1e6, Maximum IT 500 ms, isolation window 1.5 m/z. For a total of 1500 parent ions and 15 parent ions for each method, it requires a total of 100 runs, or ~42 hours using a 25-min LC method.

### 3. MS2 file conversion.

**RawConverter** (version 1.2.0.1, <http://fields.scripps.edu/rawconv/>) is used to convert the .raw file into .mzXML file that contains MS2 information. Keep the default parameters except setting Environment Type as Data Independent, and Output Formats as mzXML.

### 4. MS2 reading and cleaning.

A matlab code is used for MS2 reading and cleaning, which can be found in **CodeOcean** as a published capsule (<https://codeocean.com/capsule/1048398/tree/v1>). The csv files from 1 paired with the MS2 data files in mzXML format from 3 are the required input data. Refer to capsule description and `readme.md` file for more details of how the code works. In Brief,

- Prepare filename. Filenames for both csv and mzXML files should be named as `prefixNNN`, where prefix is the given file name and NNN is the 3 digits number in continuous order (e.g. `M001.csv`, `M002.csv`,... and `M001.mzXML`, `M002.mzXML`,... in the `/data` folder).
- Duplicate the capsule to your own account so you can edit and use the capsule. Upload your own files and remove the previous files in `/data` folder.

## Supplementary Note 3 - NetID User Guide

- Specify the prefix and the range of numbers at the beginning section of the main code `Main_example.m`.
  - Set the main code as file to run in Code Ocean using the dropdown menu next to main code.
  - Click `reproducible run` to perform the batch processing.
  - The resulting output files in `.xlsx` format with the same filenames will appear in the timeline. Each `xlsx` file contains multiple tabs of cleaned MS2 spectra. The names of the tabs correspond to the row numbers of the `csv` file specifying the individual parent peak information.
5. Save files to folders.  
Back to the `NetID_test` folder, create a new folder `MS2`, download all `xlsx` files from 4 into the folder.

### 2.2.3 Running the code

1. Open code folder → `NetID_run_script.R`.
2. In the `# Setting path ####` section, set `work_dir` as `"../NetID_test/"`.
3. In the `# Read data and files ####` section, set `filename` as `raw_data.csv`, set `MS2_folder` as `MS2`.  
set `LC_method` to specify column to read for the retention time of known standards. (In folder `NetID` → `dependent` → `known_library.csv`, update the retention time info as needed.)  
set `ion_mode` as `-1` if negative ionization data is loaded, and `1` if positive ionization data loaded.
4. Keep all other parameters as default, and run all lines.

### 2.2.4 Expected outputs

Similar to the `demo` file, the console will print out message indicating optimization step is successful, and three files `NetID_output.csv`, `NetID_output.RData` and `.RData` will be generated in the `NetID_test` folder

## 2.3 Other Settings

### 2.3.1 Compound libraries

**2.3.1.1 Other provided libraries** NetID provides 4 libraries for the user to choose: **HMDB**, **YMDB**, **PubChem**, **PubChem Bio-pathway only**.

To select the desired database, change `HMDB_library_file = "../dependent/hmdb_library.csv"` to `../dependent/ymdb_library.csv`, `../dependent/pbcm_library.csv` or `../dependent/pbcm_library-bio.csv`.

```
Mset = read_files(filename = "raw_data.csv",
                  LC_method = "Hilic_25min_QE",
                  ion_mode = -1, # 1 for pos mode and -1 for neg mode
                  HMDB_library_file = "../dependent/hmdb_library.csv")
```

)

### 2.3.1.2 Design your own library

1. A workable library requires following columns.

```
read_csv(".././dependent/hmdb_library.csv")
##
## -- Column specification -----
## cols(
##   accession = col_character(),
##   iupac_name = col_character(),
##   name = col_character(),
##   SMILES = col_character(),
##   status = col_character(),
##   formula = col_character(),
##   mass = col_double(),
##   rdbe = col_double(),
##   category = col_character()
## )
## # A tibble: 114,014 x 9
##   accession iupac_name      name SMILES      status formula  mass  rdbe category
##   <chr>      <chr>          <chr> <chr>      <chr> <chr>  <dbl> <dbl> <chr>
## 1 HMDB000000~ (2S)-2-amino-- 1-Me~ CN1C=NC(~ quant~ C7H11N~ 169.    4 Metabol~
## 2 HMDB000000~ propane-1,3-d- 1,3~~ NCCCN      quant~ C3H10N2 74.1    0 Metabol~
## 3 HMDB000000~ 2-oxobutanoic~ 2-Ke~ CCC(=O)C~ quant~ C4H6O3 102.    2 Metabol~
## 4 HMDB000000~ 2-hydroxybuta~ 2-Hy~ CCC(O)C(~ quant~ C4H8O3 104.    1 Metabol~
## 5 HMDB000000~ (1S,10R,11S,1~ 2-Me~ [H][C@@]~ quant~ C19H24~ 300.    8 Metabol~
## 6 HMDB000000~ (3R)-3-hydrox~ (R)~~ C[C@H](~ quant~ C4H8O3 104.    1 Metabol~
## 7 HMDB000000~ 1-[(2R,4S,5R)~ Deox~ OC[C@H]1~ quant~ C9H12N~ 228.    5 Metabol~
## 8 HMDB000000~ 4-amino-1-[(2~ Deox~ NC1=NC(=~ quant~ C9H13N~ 227.    5 Metabol~
## 9 HMDB000000~ (1S,2R,10R,11~ Cort~ [H][C@@]~ quant~ C21H30~ 346.    7 Metabol~
## 10 HMDB000000~ (1S,2R,10S,11~ Deox~ [H][C@@]~ quant~ C21H30~ 330.    7 Metabol~
## # ... with 114,004 more rows
```

2. To build your own library, make a csv file in the same format as the one shown above, and set `HMDB_library_file = ".././dependent/hmdb_library.csv"` to your desired directory in `NetID_run_script.R`.

### 2.3.2 Modifying `empirical_rules.csv`

`empirical_rules.csv` can also be created or modified to support specific biotransformation. A workable `empirical_rules` requires following columns. \* `name` and `note` is not necessary. \* `category` includes: `Biotransform`, `Natural_abundance`, `Adduct`, `Fragment` and `Radical` \* `rdbe` is calculated using the `formula_rdbe` function of the package `lc8` \* `direction` states the possible direction of transformation: `1` means from larger mass to smaller mass; `0` means the opposite; `-1` means both direction are possible.

```
read_csv(".././dependent/empirical_rules.csv")
##
## -- Column specification -----
```

## Supplementary Note 3 - NetID User Guide

```
## cols(  
##   category = col_character(),  
##   name = col_character(),  
##   formula = col_character(),  
##   mass = col_double(),  
##   direction = col_double(),  
##   rdbe = col_double(),  
##   note = col_character()  
## )  
## # A tibble: 84 x 7  
##   category      name formula      mass direction  rdbe note  
##   <chr>         <chr> <chr>      <dbl>      <dbl> <dbl> <chr>  
## 1 Biotransform 0-HN 01N-1H-1 0.984        0      0 Deamination  
## 2 Biotransform NH3-0 N1H30-1 1.03          0     -1 Transamination  
## 3 Biotransform H2     H2       2.02          0     -1 Hydrogenation  
## 4 Biotransform CH2    C1H2     14.0          0      0 Methylation  
## 5 Biotransform NH     N1H1     15.0          0      0 Amination  
## 6 Biotransform 0      01       16.0          0      0 Hydroxylation  
## 7 Biotransform N1H3   N1H3     17.0          0     -1 Amination (+NH3)  
## 8 Biotransform H2O    H2O1     18.0          0     -1 Hydration  
## 9 Biotransform CO     C1O1     28.0          0      1 Formylation (+CO)  
## 10 Biotransform C2H4  C2H4     28.0          0      0 Beta oxidation  
## # ... with 74 more rows
```

### 2.3.3 Retention time list

#### 2.3.3.1 Customize your own RT table

1. In the dependent folder, open the `known_library_customized.csv` file

```
read_csv("../..//dependent/known_library_customized.csv")[1:5,]  
##  
## -- Column specification -----  
## cols(  
##   name = col_character(),  
##   HMDB = col_character(),  
##   formula = col_character(),  
##   SMILES = col_character(),  
##   Hilic_25min_QE = col_double(),  
##   No_RT = col_logical()  
## )  
## # A tibble: 5 x 6  
##   name                HMDB      formula  SMILES      Hilic_25min_QE No_RT  
##   <chr>              <chr>    <chr>    <chr>      <dbl> <lgl>  
## 1 1-Methyl imidazolacetic~ HMDB000~ C6H8N2O2  CN1C=C(N=C1~ 9.05 NA  
## 2 5-L-Hydroxytryptophan <NA>     C11H12N2O3 <NA>      10.2 NA  
## 3 ADP                <NA>     C10H15N5O~ <NA>      13.9 NA  
## 4 CDP                <NA>     C9H15N3O1~ <NA>      NA NA  
## 5 CDP-choline        <NA>     C14H26N4O~ <NA>      NA NA
```

## Supplementary Note 3 - NetID User Guide

2. Column `Name`, `formula` are required. Column `HMDB`, `SMILES` are optional. For each RT list (e.g. `Hilic_25min_QE`), record the retention time under the column. Multiple RT lists can be stored by adding additional columns. Empty retention time is allowed for an entry.

**2.3.3.2 Skip RT table** Setting the `LC_method = "No_RT"`. Then RT information will not be considered in the algorithm.

```
Mset = read_files(filename = "raw_data.csv",
                 LC_method = "No_RT",
                 ion_mode = -1, # 1 for pos mode and -1 for neg mode
                 HMDB_library_file = "../dependent/hmdb_library.csv"
                 )
```

### 2.3.4 Score Setting

See Supplementary Note 2 of NetID paper for explanation

## 3 NetID Visualization

This section provides instruction to visualize and explore **NetID** output results in either **Cytoscape** software or interactive **Shiny R app**. After running **NetID** algorithm, it will export one `.R` and two `.csv` files (`cyto_node.csv` and `cyto_edges.csv`), storing the nodes and edges of the output network.

### 3.1 Cytoscape

0. What is **Cytoscape** For more info regarding what is **Cytoscape**, check [https://cytoscape.org/what\\_is\\_cytoscape.html](https://cytoscape.org/what_is_cytoscape.html).
1. install **Cytoscape** Download **Cytoscape** (<https://cytoscape.org/download.html>) and follow installation instruction to install onto your computer.
2. Load the example **NetID** output into **Cytoscape**
  - Run **Cytoscape**, click `import network from file system`, and load `cyto_edges.csv`, set `edge_id` column as the key, set `node1` as source node, set `node2` column as target node, and the rest columns as edge attribute.
  - Click `import table from file`, load `cyto_node.csv`, set `node_id` column as the key, and the rest columns as node attribute.
  - Select subnetwork, set styles, and explore the network with various functionalities inside **Cytoscape**.
3. Explore in Cytoscape <http://manual.cytoscape.org/en/stable/index.html> provides all you need to know about exploring in **Cytoscape**. (This writer knew little about this cool software, so all he could give was this link and *may the Force be with you.*)
4. Export  
The network as well as the curated subnetworks can be exported for future analysis or sharing with others. An example network file `example.cys` is included along with the two `.csv` files, which is created using **Cytoscape** version 3.8.2

### 3.2 Shiny App

This part provides instruction to visualize and explore **NetID** output results in the interactive **Shiny R app**. A 21-inch or larger screen is recommended for best visualization.

#### 3.2.1 Running Shiny App

1. Open code folder → R\_shiny\_App.R.
2. In the # Read in files #### section, set datapath as ../Sc\_neg/
3. Keep all other parameters as default, and run all lines.
4. A Shiny app will pop up.

#### 3.2.2 Searching peaks of interest

1. On the left panel, you can enter a m/z or a formula to search your peak of interest. For example, 180.0631 or C<sub>6</sub>H<sub>12</sub>O<sub>6</sub> will automatically update the data table on the right. Enter 0 to restore full list for the data table.
2. Change ionization and ppm window to adjust calculated m/z. W
3. On the right, you can explore the peak list in an interactive data table, including global text search on top right, specifying ranges for numeric column or searching text within character columns, ranking each column etc.

The screenshot shows the Shiny app interface. On the left, there are three input fields: 'Enter a m/z or formula of interest' (containing 'C6H12O6'), 'Select ionization' (a dropdown menu with 'M' selected), and 'ppm' (containing '3'). On the right, there is a data table with columns: peak\_id, medMz, medRt, log10\_inten, class, formula, and ppm\_error. The table shows one entry: peak\_id 5587, medMz 180.0631, medRt 13.61, log10\_inten 5.3, class Metabolite, formula C6H12O6, and ppm\_error 1.6. Below the table are several 'All' buttons for each column and a search bar. The table is showing 1 to 1 of 1 entries.

#### 3.2.3 Network Visualization

1. Peak ID, formula and class determines the center node for the network graph. Peak ID will be automatically updated by the first line in the data table if a m/z or formula is given. Alternatively, you can manually enter Peak ID.
2. The degree parameter controls how far the network expands from the center node. Degree 1 means only nodes directly connected to the center node will be shown and degree 2 means nodes connected to degree 1 will be shown, etc.
3. Biochemical graph shows biochemical connections. Abiotic graph shows abiotic connections. Node labels and Edge labels determines if the graph show node or edge labels. Optimized only determines whether to show only the optimal annotations or all possible annotations in the network.
4. When setting parameters, hit plot to see the network graph.



## Supplementary Note 3 - NetID User Guide

**a**

Peak ID  
5587

Formula  
C6H12O6

Class  
Metabolite

**b**

Degree  
1

**c**

Biochemical graph
  Abiotic graph

Node labels
  Edge labels
  Optimized only

**d**

Plot

5. A sample network graph is shown below (a different center node may give less complicated graph). You may edit the nodes or edges (top left), move figures with the arrow buttons (bottom left), and zoom in/out or center figure (bottom right).

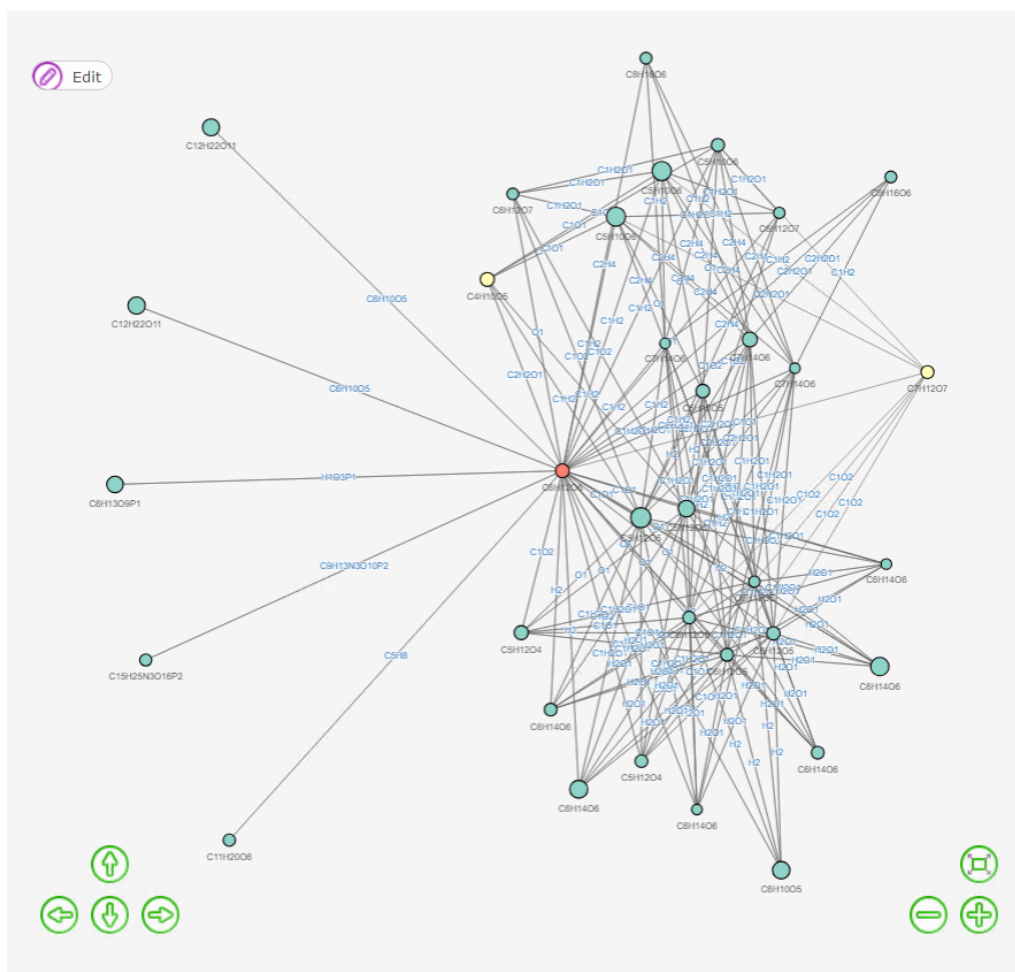

6. You can use the “Download plot” button to download a html webpage to visualize the network graph independent of the Shiny app, and the “Download csv” button to download the information of the nodes in the network. The download buttons will appear after hitting the plot button. Note: edits within the Shiny app will not go into the html file.

## Supplementary Note 3 - NetID User Guide

### 3.2.4 Possible structures exploration

A figure + data table is provided to explore structures of the selected node in the network graph.

1. The figure shows the chemical structure of the annotated metabolites. If the node is annotated as a putative metabolite, only the known parts of the putative metabolite will be shown.  
Scroll left or right, or select the entry number, to visualize different annotations. Right click and select to save image.
2. In the data table, class has 3 possible entries: Metabolite if it is documented in database such as HMDB library; Putative metabolite if it is transformed from a metabolite through a biotransformation edge; and Artifact if it is transformed by an abiotic edge.  
Use the download button to download the data table

**a**

D-Glucose C6H12O6

**b**

Show 10 entries Search:

|   | class      | annotation                         | origin       | note        |
|---|------------|------------------------------------|--------------|-------------|
| 1 | Metabolite | D-Glucose C6H12O6                  | HMDB_library | HMDB0000122 |
| 2 | Metabolite | D-Galactose C6H12O6                | HMDB_library | HMDB0000143 |
| 3 | Metabolite | D-Mannose C6H12O6                  | HMDB_library | HMDB0000169 |
| 4 | Metabolite | myo-Inositol C6H12O6               | HMDB_library | HMDB0000211 |
| 5 | Metabolite | 3-Deoxyarabinohexonic acid C6H12O6 | HMDB_library | HMDB0000346 |

## 4 Troubleshooting

### 4.1 Failing to install package `lc8`

Reinstall the packages `devtools` and `digest`.

### 4.2 Cannot find `cpLexAPI` even if the installation seems successful

Check **R** version used in **RStudio** to see if `cpLexAPI` is installed under the same R version library. Which R library `cpLexAPI` goes to depends on the R path specified in Environment Variables.

### 4.3 Add **R** to `PATH`

1. Go to Environment Variables:  
search `PATH` in windows → open edit Environment Variables → Environment Variables or  
control panel → system and security → System → Advanced system Settings (on your left) → Advanced → Environment Variables
2. In the lower Panel select the Path Variable and select Edit, add the R path (`C:\Program Files\R\R-4.0.3\bin\x64`, if installed at default location) to the Path Variable.
3. You may need to restart computer for the R path to take effect.

### 4.4 Add **Rtools40** to `PATH`

1. Add the path `C:\Rtools\bin` to the Path Variable in Environment Variables
2. Run the line in **R**:  

```
writelnLines('PATH="%{RTTOOLS40_HOME}\\usr\\bin;%{PATH}"', con = "~/Renvi  
ron")
```

Use the line below in R console to check for successfully adding Rtools40

```
Sys.which("make")
```

Expected output: `## "C:\\rtools40\\usr\\bin\\make.exe`

## 1 Supplementary Note 4. NetID pseudocode

2 The whole algorithm runs in the following workflow:

- 3 1. Input data and data cleaning
- 4 2. Initializing and defining NodeSet and EdgeSet
- 5 3. Expanding candidate annotation through edge propagation
- 6 4. Defining CplexSet
- 7 5. Scoring candidate node and edge annotations
- 8 6. Global optimization
- 9 7. Network annotation
- 10 8. Output

11 # Note: description following the “#” sign are comments, and will not be run by the code.

12

### 13 1. Input data and data cleaning

14 # Input

15 **Define** *Mset* as a list, read in

16 Experimental MS1 data (containing *mz*, *RT* and intensity from LC-MS)

17 Experimental MS2 data (associated with MS1 data)

18 ionization mode

19 HMDB library file

20 HMDB library MS2 files (pos or neg)

21 Known library file (with curated *RT*)

22 Atom difference table (rule table for biotransformations, adducts, isotopes, etc.)

23

24 # Remove background peaks and duplicated entries

25 **For each** peak

26 **IF** its intensity in procedure blank > 0.5-fold of that in biological samples

27 **Remove** the peak

28 **For any two** (or more) peaks,

29 **IF** their *mz* difference is within *mz\_tol* **AND** *RT* difference within *rt\_tol*

30 **Create** a new entry by merging multiple entries

31 Take the median *mz* and *RT* of entries as new *mz* and *RT*

32 Take the largest intensity value of all entries in each sample as sample intensity

33 **Remove** old duplicated entry peaks

34

### 35 2. Initializing and defining NodeSet and EdgeSet

36 # NodeSet: Each peak is a node, and becomes an entry in nodeset.

37 **Define** *NodeSet* as a list,

38 **For each** *node* in *NodeSet*,

39 store one peak's *mz*, *RT*, *intensity*, *MS2*

40

41 # Set up seed nodes

42 **For each** *node* in *NodeSet*,

43 **IF** *mz\_difference* < 10 ppm by comparing measured *mz* to all formulae in HMDB library

44                   **Add** HMDB ID, formula and class information to corresponding node

45

46                   # Adjust systematic measurement errors

47                   **For all** nodes in *NodeSet* that has at least one HMDB entry,

48                    **Linear regression** using measured mz values of selected nodes and their HMDB formula mz

49                    an absolute mz adjustment factor  $\epsilon_{\text{absolute}}$  (independent of measured mz)

50                    a relative mz adjustment factor  $\epsilon_{\text{relative}}$  (linearly dependent on measured mz)

51                   **For each** node *u* in *NodeSet*

52                    **Recalculate** measured mz by applying

53                    
$$u_{\text{mz,adjusted}} = u_{\text{mz,measured}} \times (1 + \epsilon_{\text{relative}}) + \epsilon_{\text{absolute}}$$

54

55                   # *EdgeSet*: Each edge connects two nodes by a mass difference defined in atom difference table

56                   **Define** *EdgeSet* as a list,

57                   **For each** pair of node *u* and *v* (assuming  $v_{\text{mz}} > u_{\text{mz}}$ ), and for each difference  $D_i$  in atom difference table,

58                    **IF**  $|(v_{\text{m/z}} - u_{\text{m/z}}) - D_i| < v_{\text{m/z}} \times 10 \text{ ppm}$ ,

59                    **IF**  $D_i$  is a Biotransformation connection (defined in atom difference table)

60                    **Add** an edge with *node1* = *u*, *node2* = *v*, and related info for  $D_i$  to *EdgeSet*

61                    **IF**  $D_i$  is an Abiotic connection (defined in atom difference table) **AND**

62                    **IF**  $|v_{\text{RT}} - u_{\text{RT}}| < 0.2 \text{ min}$

63                    **Add** an edge with *node1* = *u*, *node2* = *v*, and related info for  $D_i$  to *EdgeSet*.

64

65                   # *EdgeSet* expansion with additional abiotic connections (see manuscript methods)

66                   # including oligomers, multi-charge species, heterodimers, in-source fragments, etc.

67                   **For each** pair of node *u* and *v*

68                    **IF**  $|v_{\text{RT}} - u_{\text{RT}}| < 0.2 \text{ min}$  **AND**

69                    **IF** properties of node *u* and *v* satisfy the criteria for additional abiotic connections

70                    **Add** an edge with *node1* = *u*, *node2* = *v*, and related info for  $D_i$  to *EdgeSet*.

71

72                   **3. Expanding candidate node annotation through edge propagation**

73                    # By applying the atom difference of edge (*u*, *v*) on the formula assigned to seed node *u*,

74                    # we can derive a new candidate formula for the connected node *v*.

75                    # Iterating the process to all candidate formulae of node *u* through edge (*u*, *v*) will

76                    # further expand candidate formulae for node *v*.

77                    # Seed nodes formulae from HMDB belong to Metabolite class.

78                    **For each** edge (*u*, *v*) connecting node *u*, *v* in *EdgeSet* **AND**  $D_i$  is a Biotransformation connection

79                    **For each** candidate formula of node *u*,  $u_{\text{formula}}$ , that belongs to Metabolite class

80                    **IF** calculated mz of  $u_{\text{formula}} + D_{i,\text{formula}}$  is within 5 ppm of measured mz of node *v*

81                    **Add** combined formula ( $u_{\text{formula}} + D_{i,\text{formula}}$ ) with Metabolite class to node *v*

82                    **For each** edge (*u*, *v*) connecting node *u*, *v* in *EdgeSet* **AND**  $D_i$  is an Abiotic connection

83                    **For each** candidate formula of node *u*,  $u_{\text{formula}}$

84                    **IF** calculated mz of  $u_{\text{formula}} + D_{i,\text{formula}}$  is within 5 ppm of measured mz of node *v*

85                    **Add** combined formula ( $u_{\text{formula}} + D_{i,\text{formula}}$ ) with Artifact class to node *v*

86                    **REPEAT** LINE 81-84 (above 4 lines) three times (three rounds of expansion via abiotic connections)

87                    **REPEAT** LINE 77-85 (above 9 lines) two times (two rounds of expansion via biotransformation connections)

88

#### 89 4. Defining CplexSet

90 # CplexSet defines the network structure for global network optimization

91 # Each node may contain zero, one or more than one candidate node annotations

92 # Each candidate node annotation defines an *ilp\_node* in CplexSet (ilp means integer linear programming)

93 # We use *ilp\_nodes* to score and record each candidate node annotation

94 # Similarly, we use *ilp\_edges* to score and record each candidate edge annotation

95 **For each** node  $u$  in *NodeSet*,

96     **For each** candidate node annotation  $a_i$  in  $u$ ,

97         **IF** the combination of *node\_id*, *formula* and *class* of  $a_i$  is not in *ilp\_nodes*

98             **Add** the candidate annotation  $(u, a_i)$  to *ilp\_nodes*

99 **For each** edge  $(u, v)$  in *EdgeSet*,

100     **For each** atom difference  $D_k$

101         **For each** candidate node annotation  $a_i$  in  $u$ , and  $b_j$  in  $v$

102             **IF** combined formula  $(a_i + D_{k,formula}) == b_j$

103                 **Add** the candidate edge annotation  $(u, v, a_i, b_j, D_k)$  to *ilp\_edges*

104

#### 105 5. Scoring candidate node and edge annotations

106 # The scoring system is to assign high scores to annotations that effectively align the experimentally observed

107 # ion peaks with prior metabolomics knowledge.

108 # See manuscript method section for more details on score terms.

109 **For each** candidate node annotation  $(u, a_i)$ , its score  $S(u, a_i)$  is the sum of

110      $S_{m/z}(u, a_i)$  # based on m/z accuracy,

111      $S_{RT}(u, a_i)$  # based on RT of measured peaks and known standards

112      $S_{MS2}(u, a_i)$  # based on MS2 of measured peaks and database MS2

113      $S_{database}(u, a_i)$  # based on if the annotation  $a_i$  exists in HMDB

114      $S_{missingisotope}(u, a_i)$  # based on if the expected isotopic peak for  $a_i$  is missing

115      $S_{rule}(u, a_i)$  # based on if  $a_i$  violates basic chemical rules

116      $S_{derivative}(u, a_i)$  # based on if  $a_i$  is derived from a parent peak with a high annotation score

117 **For each** candidate node annotation  $(u, v, a_i, b_j, D_k)$ , its score  $S(u, v, a_i, b_j, D_k)$  is the sum of

118      $S_{MS2\_similarity}(u, v, a_i, b_j, D_k)$  # based on similarity of measured MS2 spectra of node  $u$  and  $v$

119      $S_{co\_elution}(u, v, a_i, b_j, D_k)$  # based on RT difference of node  $u$  and  $v$

120      $S_{type}(u, v, a_i, b_j, D_k)$  # based on the connection type, defined by  $D_k$  in the atom difference table

121      $S_{isotope\_intensity}(u, v, a_i, b_j, D_k)$  # based on the intensity ratio and expected natural abundance

122

#### 123 6. Global optimization

124 # The goal is to find annotations for each node so as to maximize the sum of the scores across the network

125 # under the constraints that each node is assigned a single annotation,

126 # and that the network annotation is consistent.

127 # An example optimization problem using CPLEX in R can be found at

128 # <https://cran.r-project.org/web/packages/cplexAPI/vignettes/cplexAPI.pdf>

129 **Define**  $x$  as a vector of binary number

130     # if  $x_i = 1$ , the candidate node or edge annotation is selected in the global optimal network

131     # if  $x_i = 0$ , then the annotation is not selected.

```

132     Length(x) = (number of candidate node annotation) + (number of candidate edge annotation)
133 Define Obj as a vector with the same length of x
134     # Obj records score for each candidate node or edge annotation
135     # Obj · x is the total scores of the network. Global optimization maximizes the total scores.
136     Obj = c(scores for ilp_nodes, scores for ilp_edges)
137
138 # Constraints are defined as below.
139 # For a sample constraint  $a_1x_1 + a_2x_2 \leq b$ ,
140 #  $a_1x_1 + a_2x_2$  is the left-hand side, b is the right-hand side and “ $\leq$ ” is the sense of the constraint
141 # [a1, a2] is the constraint matrix, [a1, a2] · x is the left-hand side of a constraint
142 Define mat as a matrix
143     # mat · x is the left-hand side of the constraint.
144     # mat is a sparse matrix as most number in mat are zero.
145     Column number of mat = Length(x)
146     Row number of mat = Number of constraints
147 Define triplet_mat as a matrix
148     # we use triplet (i,j,v), i.e. the value (v) in the ith row, and jth column, to describe mat.
149     Column number of triplet_mat = 3
150     Row number of triplet_mat = number of non-zero entry in mat
151 Define rhs as a numeric vector
152     # rhs is the right-hand side of a constraint
153     Length(rhs) = Number of constraints
154 Define sense as a character vector
155     # rhs describes the signs between left- and right-hand sides
156     # Signs includes less or equal (L), equal (E), greater or equal (G)
157     Length(sense) = Number of constraints
158
159 # How constraint matrix is filled up is described below.
160 # (I) Constrain each peak has single annotation.
161     # Total number for this constraint = number of peaks
162     # for all annotation ai of peak u, sum (xai) = 1
163     For each candidate node annotation in ilp_nodes,
164         Add i = peak_id, j = ilp_node_id, v = 1 to triplet_mat
165     Add rep(1, number of peaks) to rhs
166     Add rep('E', number of peaks) to sense
167
168 # (II) Constrain each edge annotation exists only if related candidate node annotations exist.
169     # Total number for this constraint = number of candidate edge annotations * 2
170     # In candidate edge annotation  $e(u,v,a_i,b_j,D_k)$ ,  $x_e - x_{ai} \leq 0$  and  $x_e - x_{bj} \leq 0$ 
171     icurrent = total number of constraints from (I)
172     For each candidate edge annotation in ilp_edges,
173         icurrent = icurrent + 1
174         Add i = icurrent, j = ilp_edge_id, and v = 1;
175         i = icurrent, j = ilp_node_id for ai, and v = -1 to triplet_mat

```

```

176          $i_{current} = i_{current} + 1$ 
177         Add  $i = i_{current}$ ,  $j = ilp\_edge\_id$ , and  $v = 1$ ;
178          $i = i_{current}$ ,  $j = ilp\_node\_id$  for  $b_j$ , and  $v = -1$  to triplet_mat
179         Add rep(0, number of candidate edge annotations * 2) to rhs
180         Add rep('L', number of candidate edge annotations * 2) to sense
181
182     # (III) Constrain an isotope annotation exists only if the isotope connection exists
183     # Total number for this constraint = number of candidate edge annotation that is an isotope connection
184     # In candidate edge annotation  $e(u,v,a_i,b_j,D_k)$ , assuming  $b_j$  is an isotope annotation,  $x_e - x_{b_j} = 0$ 
185      $i_{current} =$  total number of constraints from (I-II)
186     For each candidate edge annotation in ilp_edges that is an isotope connection
187          $i_{current} = i_{current} + 1$ 
188         Add  $i = i_{current}$ ,  $j = ilp\_edge\_id$ , and  $v = 1$ ;
189          $i = i_{current}$ ,  $j = ilp\_node\_id$  for  $b_j$ , and  $v = -1$  to triplet_mat
190         Add rep(0, number of candidate edge annotation that is an isotope connection) to rhs
191         Add rep('E', number of candidate edge annotation that is an isotope connection) to sense
192
193     # (IV) Constrain only one edge can exist between two nodes
194     # Total number for this constraint = number of multiple-edge events * 2
195     # When multiple edges exist between two nodes, we call it multiple-edge event
196     # Assuming candidate edge annotation  $e(u,v,a_i,b_j,D_k)$ ,  $e'(u,v,a_i,b_j,D_k)$  and multiple edges exist
197     # At most one edge exist:  $x_e + x_{e'} + \dots - x_{a_i} \leq 0$ ,  $x_e + x_{e'} + \dots - x_{b_j} \leq 0$ 
198      $i_{current} =$  total number of constraints from (I-III)
199     For each multiple edge event
200          $i_{current} = i_{current} + 1$ 
201         Add  $i = i_{current}$ ,  $j = ilp\_node\_id$  for  $a_i$ , and  $v = -1$  to triplet_mat
202         For each candidate annotation  $e$  that exist between node  $u$  and node  $v$  with  $a_i$  and  $b_j$  annotation
203             Add  $i = i_{current}$ ,  $j = ilp\_edge\_id$  for  $e$ , and  $v = 1$  to triplet_mat
204          $i_{current} = i_{current} + 1$ 
205         Add  $i = i_{current}$ ,  $j = ilp\_node\_id$  for  $b_j$ , and  $v = -1$  to triplet_mat
206         For each candidate annotation  $e$  that exist between node  $u$  and node  $v$  with  $a_i$  and  $b_j$  annotation
207             Add  $i = i_{current}$ ,  $j = ilp\_edge\_id$  for  $e$ , and  $v = 1$  to triplet_mat
208         Add rep(0, number of multiple edge event * 2) to rhs
209         Add rep('L', number of multiple edge event * 2) to sense
210
211     # Pass parameters to CPLEX optimization
212     Add CplexPara = list( $nc =$  Length( $x$ ),  $nr =$  number of constraint # number of columns and rows
213         CPX_MAX, # indicating maximization will be performed
214         obj, rhs, sense, # described above
215         cnt, ind, val, # describing mat in compressed sparse column (CSC) format
216          $lb = 0$ ,  $ub = 1$ , ctype = "B" #  $x$ 's lower and upper bound, and its type is binary
217         ) to CplexSet
218
219     # CPLEX optimization

```



```

220     # ilp_solution contains a vector of binary number that
221     # denotes if a candidate node or edge annotation is selected for the global optimal network.
222     ilp_solution = Run_cplex(CplexSet)
223     optimized_nodes = Filter ilp_nodes that selected in ilp_solution
224     optimized_edges = Filter ilp_edges that selected in ilp_solution
225
226 7. Network annotation
227     # Seeds are node annotations that have direct annotations from HMDB,
228     Define optimized_seed_nodes = Filter optimized_nodes that have HMDB annotations
229     Define optimized_nodes_M = Filter optimized_nodes that are Metabolite class annotation
230     Define optimized_nodes_A = Filter optimized_nodes that are Artifact class annotation
231     Define optimized_edges_M = Filter optimized_edges that are Biotransformation connections
232     Define optimized_edges_A = Filter optimized_edges that are Abiotic connections
233
234     # The output network is an overlay of a biotransformation network and an abiotic network
235     Define g_bio, g_abiotic, g_all as graphs,
236         g_bio = graph (edges = optimized_edges_M,
237                     nodes = optimized_nodes_M)
238         g_abiotic = graph (edges = optimized_edges_A,
239                          nodes = optimized_nodes that exist in optimized_edges_A)
240         g_all = g_bio + g_abiotic
241
242     # Every node annotation in the network can trace back to seed annotation
243     Define bio_dist as a distance matrix,
244         # distance in row i and column j records
245         # the shortest distance from node i in optimized_seed_nodes to node j in optimized_nodes_M
246         bio_dist = shortest.paths(graph = g_bio,
247                                 from = optimized_seed_nodes,
248                                 to = optimized_nodes_M)
249     Define abiotic_dist as a distance matrix,
250         # distance in row i and column j records
251         # the shortest distance from node i in optimized_nodes_M to node j in optimized_nodes_A
252         abiotic_dist = shortest.paths(graph = g_abiotic,
253                                       from = optimized_nodes_M,
254                                       to = optimized_nodes_A)
255
256     # Path annotations to nodes
257     For each node M in optimized_nodes_M
258         Find seed node H that has shortest distances to M among all optimized_seed_nodes in bio_dist
259         Define path as the intermediate edges and nodes connecting from H to M
260         Add path annotation = c(HMDB name of H,
261                                 HMDB formula of H,
262                                 # Atom differences are specified by edge annotations in path
263                                 1st step atom difference, “->”, intermediate node formula,

```

```

264         ...
265         last step atom difference, "->", Formula of M) to node M
266         # for acetyl-thiamine peak: "thiamine C12H16N4O1S1 + C2H2O1 -> C14H18N4O2S1"
267     For each node A in optimized_nodes_A
268         Find Metabolite class node M that has shortest distances to A among all in abiotic_dist
269         Define path as the intermediate edges and nodes connecting from M to A
270         Add path annotation = c(Formula of M,
271             # Atom differences are specified by edge annotations in path
272             1st step atom difference, "->", intermediate node formula,
273             ...
274             last step atom difference, "->", Formula of A) to node A
275         # for glutamate sodium acetate adduct peak:
276         # "C5H9N1O4 + Na1H-1 -> C5H8Na1N1O4 + C2H4O2 -> C7H12N1Na1O6"
277
278 8. Output
279     # csv format
280     For all peaks,
281         compiles peak_id, medMz, medRt, log10_inten, class, formula, ppm_error, path annotation
282     Exports as NetID_output.csv
283     # Shiny R visualization
284     Save all information as NetID_output.RData for Shiny R visualization
285
286

```
